# Supplementary material for: Rumen and Fecal Microbiota Characteristics of Qinchuan Cattle with Divergent Residual Feed Intake
Source: MDPI journal article supplement (doi:10.3390/microorganisms11020358), 2023-01-31
Supplement: s1 [file s1]

Article

# Rumen and Fecal Microbiota Characteristics of Qinchuan Cattle with Divergent Residual Feed Intake

Xiaonan Zhou <sup>†</sup>, Ying Ma <sup>†</sup>, Chaoyun Yang, Zhiyan Zhao, Yanling Ding, Yanfeng Zhang, Pengfei Wang, Lei Zhao, Chenglong Li, Zonghua Su, Xiaowei Wang, Wenxun Ming, Ling Zeng and Xiaolong Kang <sup>\*</sup>

Key Laboratory of Ruminant Molecular and Cellular Breeding, School of Agriculture, Ningxia University, Yinchuan, China

<sup>\*</sup> Correspondence: kangxl9527@126.com

<sup>†</sup>These authors contributed equally to this work.

## Supplementary Figures

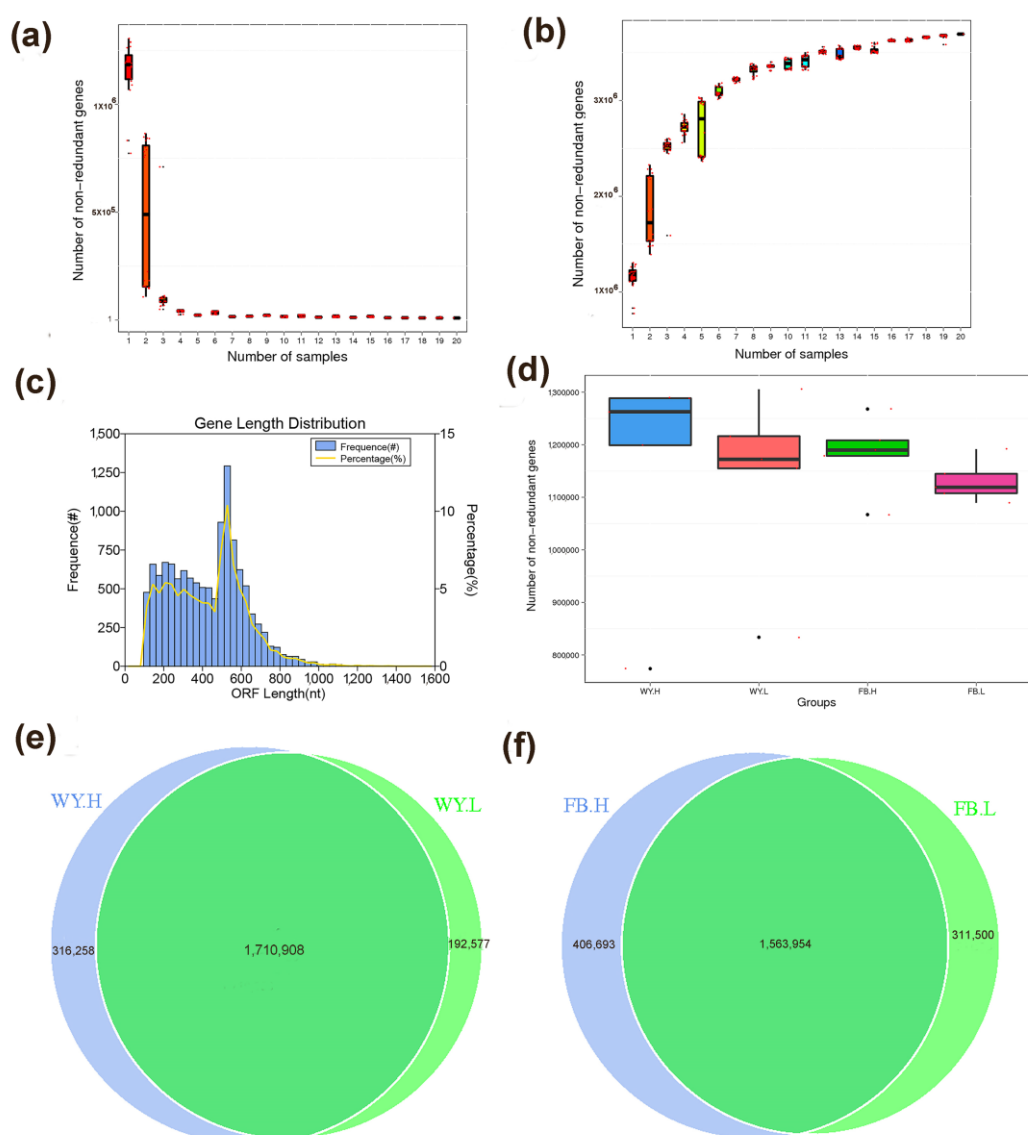

**Figure S1.** Gene abundance statistics. (a) Core genome sparsity curve; (b) Pan-genome sparsity curve; (c) Gene length distribution plot; (d) Box plot showing the difference in gene numbering

between two groups; (e) Number of shared and unique genes between two groups; (f) Number of shared and unique genes between two groups.

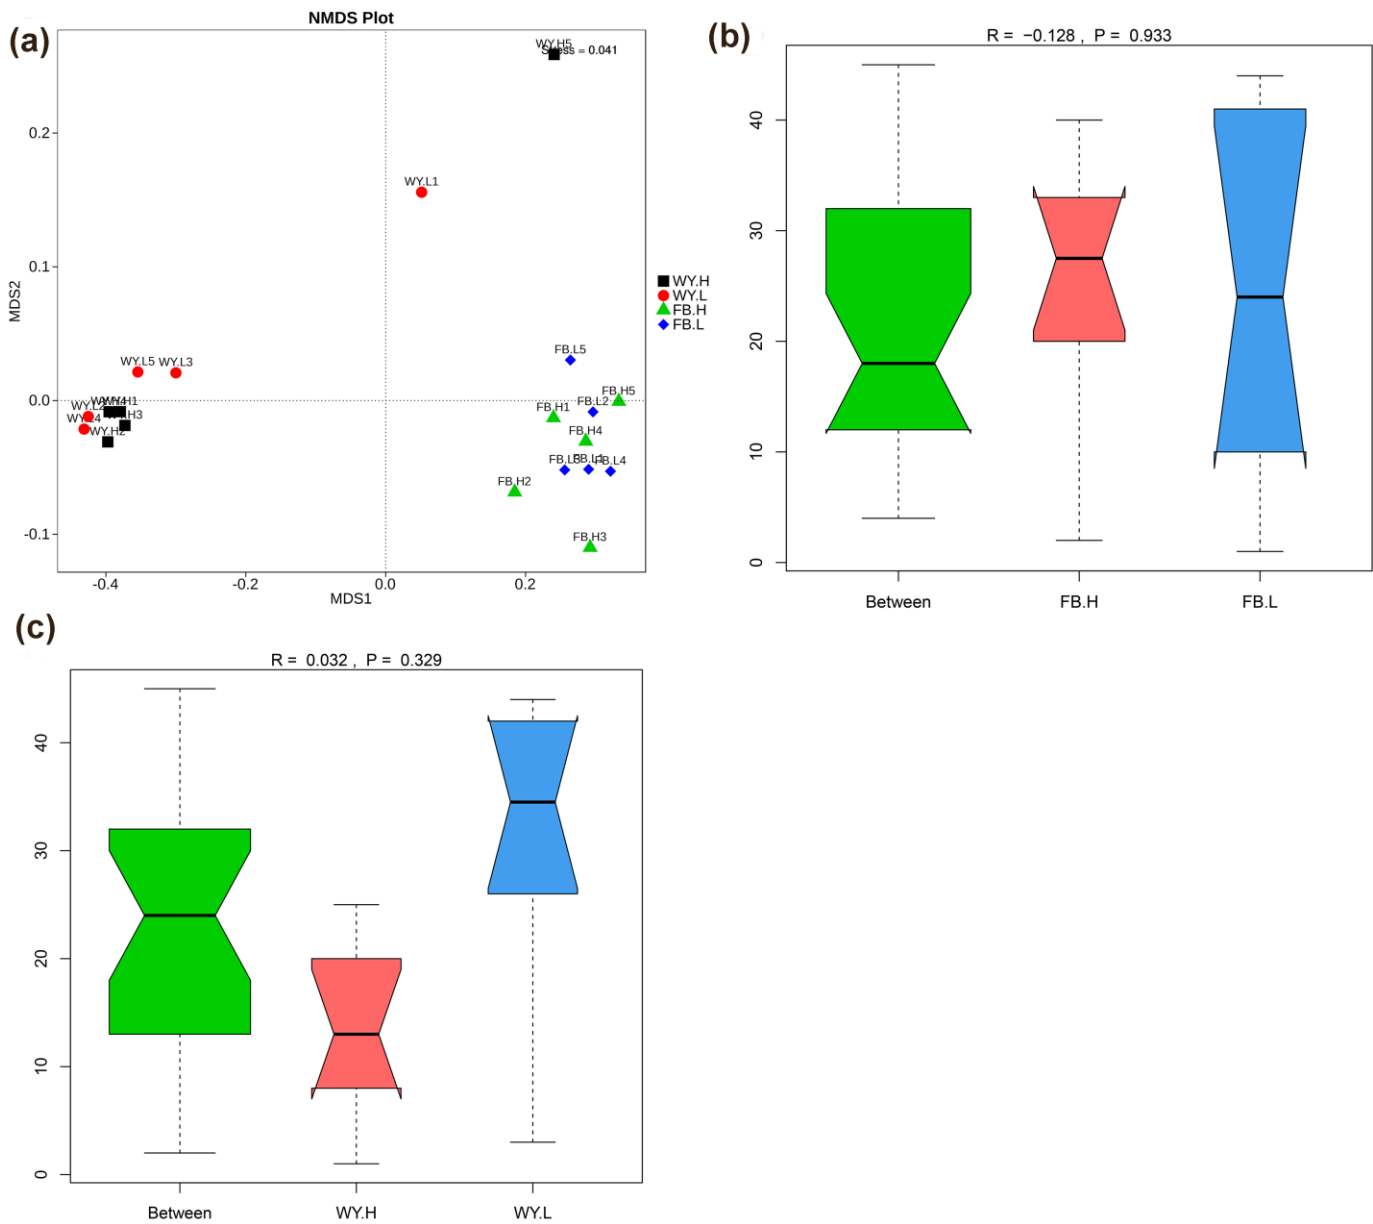

**Figure S2.** Non-metric multidimensional scaling (NMDS) results. (a) and ANOSIM analysis based on gate-level (b, c).

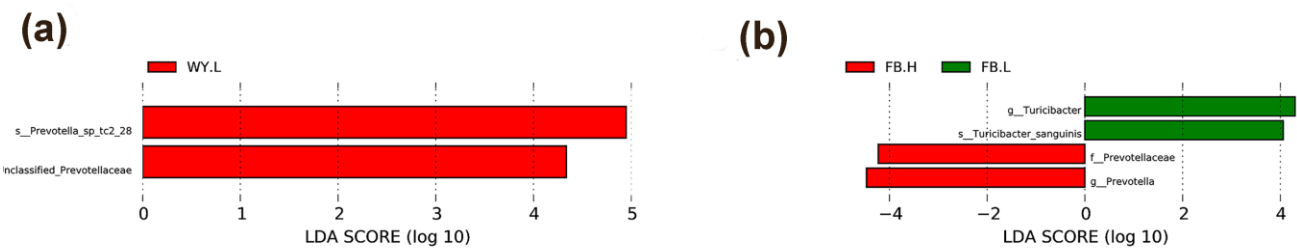

**Figure S3.** Distribution of linear discriminant analysis (LDA) values and evolutionary branching of divergent species. (a) WY.H VS WY.L; (b) FB.H VS FB.L.

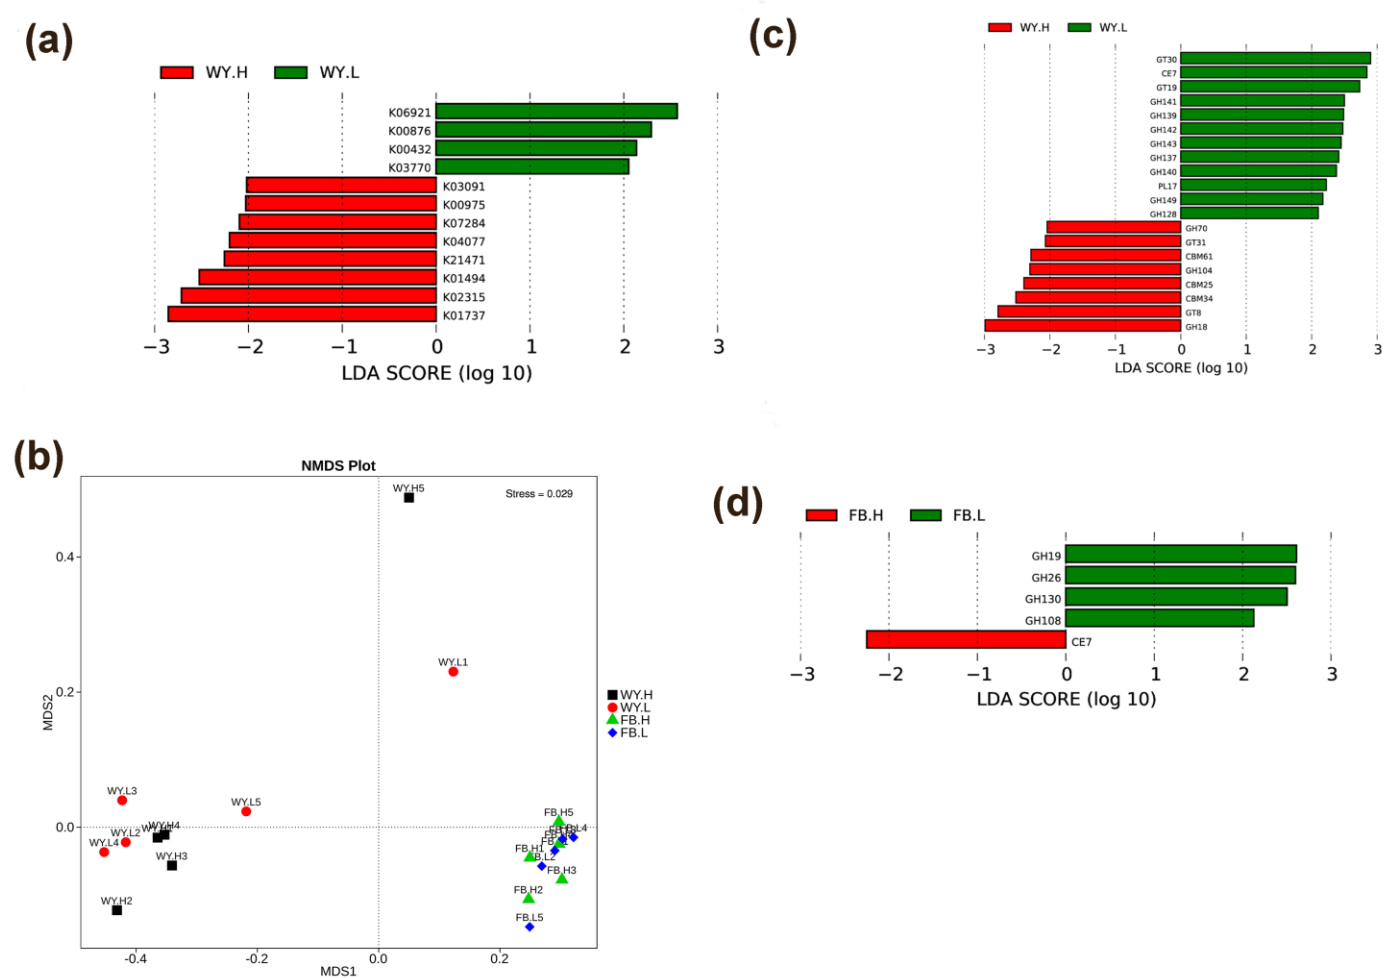

**Figure S4.** Functional analysis of rumen and fecal microbiota. (a) KEGG analysis of rumen microbiota; (b) NMDS analysis of feces microbiota; (c) KEGG analysis of rumen microbiota (d) KEGG analysis of feces microbiota; Distribution of linear discriminant analysis (LDA) values for different functions: (c) WY.H VS WY.L; (d) FB.H VS FB.L.

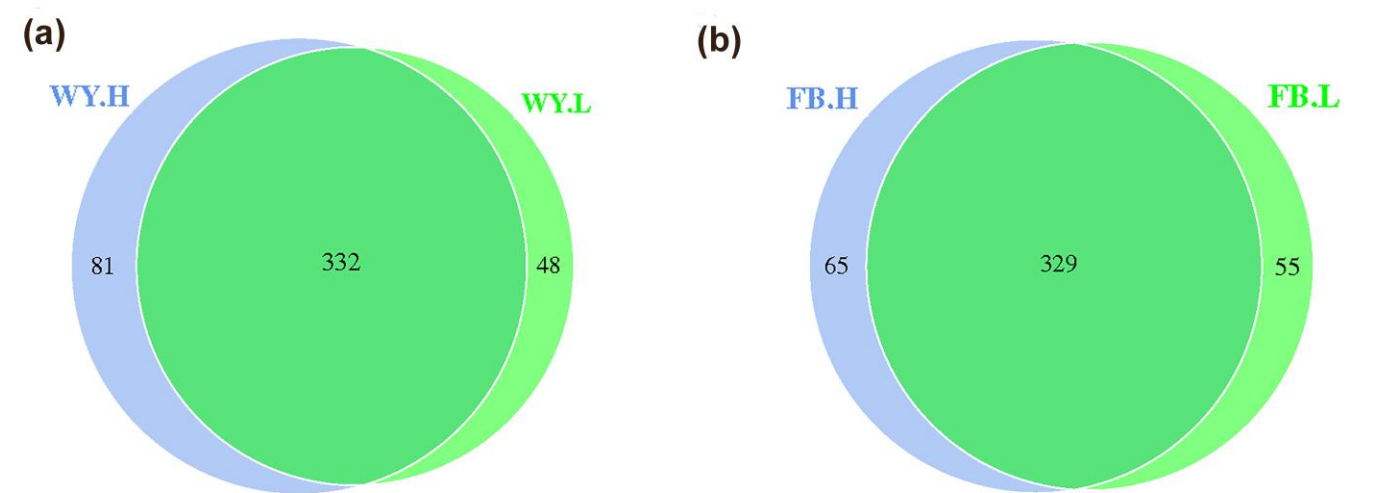

**Figure S5.** Venn diagram of resistance gene box among the two groups. (a) WY.H VS WY.L; (b) FB.H VS FB.L.

## Supplementary Tables

**Table S1.** 43 differentially expressed genes in intestinal transcriptome at different RFIs.

| <b>Gene Name</b>    | <b>log2 (Foldchange)</b> | <b>P-Value</b> | <b>FDR</b> | <b>Style</b> |
|---------------------|--------------------------|----------------|------------|--------------|
| <i>LOC781720</i>    | 3.0956                   | 0.0000         | 0.0000     | up           |
| <i>LOC100847574</i> | 4.4684                   | 0.0000         | 0.0000     | up           |
| <i>LOC781256</i>    | -5.1688                  | 0.0000         | 0.0000     | down         |
| <i>MRPL23</i>       | -0.9338                  | 0.0000         | 0.0000     | down         |
| <i>GCSAML</i>       | 2.3837                   | 0.0000         | 0.0000     | up           |
| <i>ACOT2.1</i>      | -3.4098                  | 0.0000         | 0.0001     | down         |
| <i>RARRES1</i>      | -1.2230                  | 0.0000         | 0.0002     | down         |
| <i>MFI2</i>         | -1.5617                  | 0.0000         | 0.0003     | down         |
| <i>LOC509961</i>    | -1.1876                  | 0.0000         | 0.0008     | down         |
| <i>LOC539876</i>    | -1.2169                  | 0.0000         | 0.0014     | down         |
| <i>PRDX4</i>        | -0.6009                  | 0.0000         | 0.0014     | down         |
| <i>CPA3</i>         | 1.8477                   | 0.0000         | 0.0017     | up           |
| <i>LOC407163</i>    | -6.6653                  | 0.0000         | 0.0017     | down         |
| <i>TH</i>           | 1.6242                   | 0.0000         | 0.0021     | up           |
| <i>FETUB</i>        | 4.9362                   | 0.0000         | 0.0024     | up           |
| <i>EAF2</i>         | -0.9485                  | 0.0000         | 0.0032     | down         |
| <i>HPD</i>          | -2.1522                  | 0.0000         | 0.0044     | down         |
| <i>LOC508441</i>    | 1.7676                   | 0.0000         | 0.0046     | up           |
| <i>ISL1</i>         | 1.0655                   | 0.0000         | 0.0046     | up           |
| <i>ARHGAP15</i>     | -0.7072                  | 0.0000         | 0.0052     | down         |
| <i>GRP</i>          | 1.6598                   | 0.0000         | 0.0073     | up           |
| <i>SLC50A1</i>      | -0.7412                  | 0.0000         | 0.0085     | down         |
| <i>TFF2</i>         | -0.7987                  | 0.0000         | 0.0086     | down         |
| <i>CHI3L2</i>       | -3.4622                  | 0.0000         | 0.0098     | up           |
| <i>TDO2</i>         | 1.4534                   | 0.0000         | 0.0098     | down         |
| <i>LOC514507</i>    | 4.7850                   | 0.0000         | 0.0111     | up           |
| <i>VPREB2</i>       | -1.9922                  | 0.0000         | 0.0112     | down         |
| <i>LOC104973638</i> | -7.0704                  | 0.0000         | 0.0112     | down         |
| <i>LOC100851913</i> | -2.6272                  | 0.0000         | 0.0114     | down         |
| <i>LOC786867</i>    | 4.3015                   | 0.0000         | 0.0143     | up           |
| <i>PEBP4</i>        | -0.9701                  | 0.0000         | 0.0170     | down         |
| <i>LOC100141266</i> | -1.3293                  | 0.0000         | 0.0191     | down         |
| <i>AQP3</i>         | -0.8545                  | 0.0000         | 0.0206     | down         |
| <i>CDH26</i>        | 3.1660                   | 0.0000         | 0.0211     | up           |
| <i>CHGB</i>         | 1.3096                   | 0.0000         | 0.0261     | up           |
| <i>FAM3D</i>        | -0.5922                  | 0.0001         | 0.0266     | down         |
| <i>CCL5</i>         | -0.8184                  | 0.0001         | 0.0266     | down         |
| <i>CCK</i>          | 1.3095                   | 0.0001         | 0.0297     | up           |
| <i>CCR4</i>         | -1.6659                  | 0.0001         | 0.0314     | down         |
| <i>IL17F</i>        | -5.5405                  | 0.0001         | 0.0351     | down         |
| <i>CFAP58</i>       | -2.5937                  | 0.0001         | 0.0351     | down         |
| <i>ASCL1</i>        | 2.1796                   | 0.0001         | 0.0426     | up           |
| <i>CD52</i>         | -0.8999                  | 0.0001         | 0.0447     | down         |

**Table S2.** Significance analysis of production performance of Qinchuan cattle with different RFI (Mean  $\pm$  SD).

|                               | HRFI Group         | LRFI Group         | P-Value |
|-------------------------------|--------------------|--------------------|---------|
| Initial body weight(kg)       | 273.50 $\pm$ 20.28 | 285.75 $\pm$ 22.32 | 0.448   |
| Final body weight (kg)        | 412.50 $\pm$ 35.10 | 419.25 $\pm$ 28.72 | 0.776   |
| Average daily gain (kg/d)     | 1.187 $\pm$ 0.06   | 1.21 $\pm$ 0.047   | 0.450   |
| Actual daily feed intake (kg) | 11.86 $\pm$ 0.08   | 10.44 $\pm$ 0.23   | 0.004   |
| RFI (kg)                      | 0.55 $\pm$ 0.044   | −0.84 $\pm$ 0.13   | 0.006   |

SD standard deviation.

**Table S3.** Raw data filtering statistics.

| Sample Name | Raw Data  | Clean Data | Q20 Content (%) | Q30 Content (%) | GC Content (%) |
|-------------|-----------|------------|-----------------|-----------------|----------------|
| WY.H1       | 13,480.62 | 13,428.48  | 97.20           | 91.98           | 34.19          |
| WY.H2       | 13,006.87 | 12,962.35  | 97.07           | 91.72           | 29.27          |
| WY.H3       | 13,754.91 | 13,711.80  | 97.28           | 92.19           | 32.36          |
| WY.H4       | 13,612.34 | 13,572.89  | 97.27           | 92.21           | 33.16          |
| WY.H5       | 14,975.90 | 14,964.36  | 96.52           | 90.67           | 42.92          |
| WY.L1       | 13,129.56 | 13,122.49  | 97.49           | 92.80           | 47.48          |
| WY.L2       | 13,135.14 | 13,113.61  | 97.35           | 92.22           | 30.36          |
| WY.L3       | 12,668.74 | 12,631.11  | 97.25           | 92.17           | 35.38          |
| WY.L4       | 13,050.74 | 13,032.51  | 96.88           | 91.19           | 29.32          |
| WY.L5       | 13,020.91 | 12,986.51  | 97.30           | 92.31           | 39.72          |
| FB.H1       | 12,664.17 | 12,641.64  | 97.56           | 92.97           | 45.66          |
| FB.H2       | 12,812.16 | 12,799.09  | 97.53           | 92.79           | 45.33          |
| FB.H3       | 12,228.62 | 12,209.60  | 97.64           | 93.05           | 43.28          |
| FB.H4       | 12,793.23 | 12,779.56  | 97.38           | 92.46           | 44.27          |
| FB.H5       | 13,718.24 | 13,691.41  | 97.36           | 92.54           | 44.12          |
| FB.L1       | 13,365.36 | 13,352.09  | 97.08           | 91.79           | 44.42          |
| FB.L2       | 13,553.91 | 13,543.11  | 97.32           | 92.34           | 43.34          |
| FB.L3       | 12,897.86 | 12,881.15  | 97.30           | 92.29           | 42.97          |
| FB.L4       | 12,653.89 | 12,644.64  | 97.69           | 93.13           | 43.87          |
| FB.L5       | 13,702.14 | 13,634.43  | 97.69           | 93.17           | 43.12          |

**Table S4.** The percent for all phyla in rumen and feces samples.

| Species Name           | WY-L    | WY-H    | FB-L    | FB-H    |
|------------------------|---------|---------|---------|---------|
| <i>Bacteroidetes</i>   | 15.000% | 12.000% | 17.000% | 16.000% |
| <i>Firmicutes</i>      | 14.000% | 12.000% | 24.000% | 25.000% |
| <i>Euryarchaeota</i>   | 0.740%  | 1.100%  | 0.440%  | 0.250%  |
| <i>Actinobacteria</i>  | 0.210%  |         | 0.860%  | 0.860%  |
| <i>Fibrobacteres</i>   | 0.210%  | 0.270%  | 0.200%  | 0.082%  |
| <i>Spirochaetes</i>    | 0.210%  | 0.280%  | 0.940%  | 0.910%  |
| <i>Chlamydiae</i>      | 0.210%  | 0.790%  | 0.920%  | 0.210%  |
| <i>Proteobacteria</i>  | 0.210%  | 0.280%  | 0.400%  | 0.610%  |
| <i>Verrucomicrobia</i> | 0.100%  |         |         |         |
| <i>Tenericutes</i>     | 0.110%  |         |         |         |
| <i>Fusobacteria</i>    |         | 0.090%  | 0.130%  | 0.032%  |
| <i>Ascomycota</i>      |         | 0.090%  |         |         |

---

|                                     |         |         |         |         |
|-------------------------------------|---------|---------|---------|---------|
| <i>Candidatus_Peregrinibacteria</i> |         | 0.100%  |         | 0.046%  |
| <i>Thermodesulfobacteria</i>        |         |         | 0.110%  |         |
| <i>Others</i>                       | 69.000% | 73.000% | 55.000% | 56.000% |

---
